# Supplementary material for: Pre-silencing of genes involved in the electron transport chain (ETC) pathway is associated with responsiveness to abatacept in rheumatoid arthritis
Source: PubMed Central journal article supplement (PMC5445375; doi:10.1186/s13075-017-1319-8), 2017-05-25
Supplement: 13075_2017_1319_MOESM2_ESM.pdf [file 13075_2017_1319_MOESM2_ESM.pdf]

| <b>Agilent probe ID</b> | <b>P (Corr)</b> | <b>FC</b> | <b>Gene Symbol</b> | <b>GeneName</b>                                                        | <b>RefSeqAcc</b> |
|-------------------------|-----------------|-----------|--------------------|------------------------------------------------------------------------|------------------|
| A_23_P163025            | 0.00001         | 2.36      | RNASE3             | ribonuclease, RNase A family, 3                                        | NM_002935        |
| A_32_P1712              | 0.00001         | 2.39      | RNASE2             | ribonuclease, RNase A family, 2 (liver, eosinophil-derived neurotoxin) | NM_002934        |
| A_23_P151637            | 0.00003         | 2.44      | RNASE2             | ribonuclease, RNase A family, 2 (liver, eosinophil-derived neurotoxin) | NM_002934        |
| A_24_P261929            | 0.019           | 1.43      | IFI27L1            | interferon, alpha-inducible protein 27-like 1                          | NM_206949        |
| A_23_P78134             | 0.022           | 1.24      | EMC6               | ER membrane protein complex subunit 6                                  | NM_001014764     |
| A_23_P328511            | 0.022           | 1.40      | HSBP1              | heat shock factor binding protein 1                                    | NM_001537        |
| A_23_P78563             | 0.022           | 1.43      | UBL5               | ubiquitin-like 5                                                       | NM_024292        |
| A_23_P53298             | 0.022           | 1.48      | BLOC1S1            | biogenesis of lysosomal organelles complex-1, subunit 1                | NM_001487        |
| A_23_P417632            | 0.022           | 1.94      | ECRP               | ribonuclease, RNase A family, 2 pseudogene                             | NR_033909        |
| A_23_P75769             | 0.025           | 2.17      | MS4A4A             | membrane-spanning 4-domains, subfamily A, member 4A                    | NM_024021        |
| A_23_P130642            | 0.027           | -1.24     | GBP6               | guanylate binding protein family, member 6                             | NM_198460        |
| A_24_P88505             | 0.027           | 1.44      | ZCCHC17            | zinc finger, CCHC domain containing 17                                 | NM_016505        |
| A_23_P20384             | 0.027           | 1.45      | LSM1               | LSM1, U6 small nuclear RNA associated                                  | NM_014462        |
| A_23_P76488             | 0.028           | 1.93      | EMP1               | epithelial membrane protein 1                                          | NM_001423        |
| A_23_P358555            | 0.030           | 1.31      | NAA38              | N(alpha)-acetyltransferase 38, NatC auxiliary subunit                  | NM_032356        |
| A_23_P209347            | 0.030           | -1.36     | ANKRD44            | ankyrin repeat domain 44                                               | NM_153697        |
| A_23_P25735             | 0.030           | 1.56      | PSMA6              | proteasome (prosome, macropain) subunit, alpha type, 6                 | NM_002791        |
| A_23_P81690             | 0.030           | 1.59      | COX7A2             | cytochrome c oxidase subunit VIIa polypeptide 2 (liver)                | NM_001865        |
| A_32_P98313             | 0.030           | 1.79      | NDUFA4             | NADH dehydrogenase (ubiquinone) 1 alpha subcomplex, 4, 9kDa            | NM_002489        |
| A_23_P52647             | 0.031           | -1.27     | EHD1               | EH-domain containing 1                                                 | NM_006795        |
| A_23_P154832            | 0.031           | 1.47      | ATP5J              | ATP synthase, H+ transporting, mitochondrial Fo complex, subunit F6    | NM_001003703     |
| A_23_P425932            | 0.032           | -1.27     | VTI1A              | vesicle transport through interaction with t-SNAREs 1A                 | XM_005269544     |
| A_32_P168247            | 0.032           | 1.34      | COX6A1             | cytochrome c oxidase subunit VIa polypeptide 1                         | NM_004373        |
| A_23_P15493             | 0.032           | 1.21      | PTRH2              | peptidyl-tRNA hydrolase 2                                              | NM_016077        |
| A_23_P98382             | 0.032           | 1.66      | TIMM8B             | translocase of inner mitochondrial membrane 8 homolog B (yeast)        | NM_012459        |
| A_23_P74114             | 0.034           | -1.22     | ZNF713             | zinc finger protein 713                                                | NM_182633        |
| A_23_P140146            | 0.034           | 1.47      | IFI27L2            | interferon, alpha-inducible protein 27-like 2                          | NM_032036        |
| A_23_P159650            | 0.035           | 2.01      | COX7B              | cytochrome c oxidase subunit VIIb                                      | NM_001866        |
| A_23_P1254              | 0.036           | 1.35      | GSTO1              | glutathione S-transferase omega 1                                      | NM_004832        |

|              |       |       |          |                                                               |              |
|--------------|-------|-------|----------|---------------------------------------------------------------|--------------|
| A_24_P113815 | 0.036 | -1.36 | SLC35E2  | solute carrier family 35, member E2                           | NM_182838    |
| A_23_P132644 | 0.036 | 1.40  | NCEH1    | neutral cholesterol ester hydrolase 1                         | NM_020792    |
| A_23_P41114  | 0.036 | 2.08  | CSTA     | cystatin A (stefin A)                                         | NM_005213    |
| A_32_P131377 | 0.037 | 1.26  | REEP5    | receptor accessory protein 5                                  | NM_005669    |
| A_23_P127533 | 0.037 | 1.39  | DCUN1D5  | DCN1, defective in cullin neddylation 1, domain containing 5  | NM_032299    |
| A_24_P186379 | 0.037 | 1.34  | FUOM     | fucose mutarotase                                             | NM_198472    |
| A_23_P145777 | 0.038 | 1.76  | NDUFA4   | NADH dehydrogenase (ubiquinone) 1 alpha subcomplex, 4, 9kDa   | NM_002489    |
| A_32_P43217  | 0.038 | 1.52  | PSMA6    | proteasome (prosome, macropain) subunit, alpha type, 6        | NM_002791    |
| A_23_P213718 | 0.038 | 1.77  | UQCQRQ   | ubiquinol-cytochrome c reductase, complexIII                  | NM_014402    |
| A_24_P304051 | 0.039 | 1.35  | GSTO1    | glutathione S-transferase omega 1                             | NM_004832    |
| A_23_P170233 | 0.039 | 1.91  | CSTA     | cystatin A (stefin A)                                         | NM_005213    |
| A_23_P59877  | 0.039 | 1.49  | FABP5    | fatty acid binding protein 5 (psoriasis-associated)           | NM_001444    |
| A_23_P59022  | 0.040 | -1.20 | TRERF1   | transcriptional regulating factor 1                           | NM_033502    |
| A_23_P201497 | 0.040 | -1.43 | RASSF5   | Ras association (RalGDS/AF-6) domain family member 5          | NM_182663    |
| A_23_P128734 | 0.040 | 1.47  | ERH      | enhancer of rudimentary homolog (Drosophila)                  | NM_004450    |
| A_32_P205553 | 0.040 | 1.51  | RPL26L1  | ribosomal protein L26-like 1                                  | NM_016093    |
| A_23_P380848 | 0.040 | 1.54  | TXNDC17  | thioredoxin domain containing 17                              | NM_032731    |
| A_23_P344973 | 0.040 | 1.55  | MYL6     | myosin, light chain 6, alkali, smooth muscle and non-muscle   | NM_079423    |
| A_23_P326080 | 0.040 | 4.47  | DEFA4    | defensin, alpha 4, corticostatin                              | NM_001925    |
| A_23_P26413  | 0.040 | -1.32 | RBL2     | retinoblastoma-like 2                                         | NM_005611    |
| A_32_P187827 | 0.040 | -1.38 | NPIPB9   | nuclear pore complex interacting protein family, member B9    | NM_001287251 |
| A_23_P79199  | 0.040 | 1.64  | DBI      | diazepam binding inhibitor                                    | NM_020548    |
| A_23_P114929 | 0.041 | 1.18  | MPC2     | mitochondrial pyruvate carrier 2                              | NM_015415    |
| A_23_P127467 | 0.041 | 1.22  | EIF1AD   | eukaryotic translation initiation factor 1A domain containing | NM_032325    |
| A_23_P114282 | 0.041 | 1.47  | MCTS1    | malignant T cell amplified sequence 1                         | NM_014060    |
| A_23_P353014 | 0.041 | 1.37  | CACNA2D4 | calcium channel, voltage-dependent, alpha 2/delta subunit 4   | NM_172364    |
| A_23_P371613 | 0.041 | 1.32  | CHCHD1   | coiled-coil-helix-coiled-coil-helix domain containing 1       | NM_203298    |
| A_23_P380240 | 0.041 | 3.85  | CEACAM8  | carcinoembryonic antigen-related cell adhesion molecule 8     | NM_001816    |
| A_23_P42375  | 0.043 | 1.26  | RAB32    | RAB32, member RAS oncogene family                             | NM_006834    |
| A_23_P15705  | 0.043 | 1.32  | PSMB6    | proteasome (prosome, macropain) subunit, beta type, 6         | NM_002798    |

|              |       |       |           |                                                                           |           |
|--------------|-------|-------|-----------|---------------------------------------------------------------------------|-----------|
| A_23_P71148  | 0.044 | 1.42  | BLVRA     | biliverdin reductase A                                                    | NM_000712 |
| A_24_P23245  | 0.044 | 1.57  | NDUFA6    | NADH dehydrogenase (ubiquinone) 1 alpha subcomplex, 6, 14kDa              | NM_002490 |
| A_23_P54179  | 0.045 | 1.15  | ZNF410    | zinc finger protein 410                                                   | NM_021188 |
| A_23_P103282 | 0.048 | 1.22  | TMEM59    | transmembrane protein 59                                                  | NM_004872 |
| A_23_P7087   | 0.048 | -1.14 | CTBP1-AS2 | CTBP1 antisense RNA 2 (head to head)                                      | NR_033339 |
| A_23_P326170 | 0.048 | 1.28  | CALM2     | calmodulin 2 (phosphorylase kinase, delta)                                | NM_001743 |
| A_23_P63178  | 0.049 | 1.26  | TAF12     | TAF12 RNA polymerase II, TATA box binding protein (TBP)-associated factor | NM_005644 |
| A_23_P7697   | 0.049 | 1.28  | SNX2      | sorting nexin 2                                                           | NM_003100 |
| A_23_P97005  | 0.049 | -1.42 | JAK1      | Janus kinase 1                                                            | NM_002227 |
| A_23_P205281 | 0.050 | 1.39  | C14orf2   | chromosome 14 open reading frame 2                                        | NM_004894 |

**Additional file 2: Transcripts differentially expressed in ABA/MTX responders (R) vs non-responders (NR).** Only Agilent's probes with accession number (RefSeqAcc) are reported in this table (69 out of 87 transcripts). Fold change (FC) is the ratio of relative abundance of transcripts in NR *versus* R. Positive FC means an up-regulation of the corresponding transcript in NR patients and conversely. *P* values were determined by t-test with Benjamini-Hochberg correction for false discovery rate estimation ( $p < 0.05$ ).
