# Supplementary material for: Pre-silencing of genes involved in the electron transport chain (ETC) pathway is associated with responsiveness to abatacept in rheumatoid arthritis
Source: Springer Nature journal article supplement (doi:10.1186/s13075-017-1319-8), 2017-05-25
Supplement: MOESM1 [file 12316062]

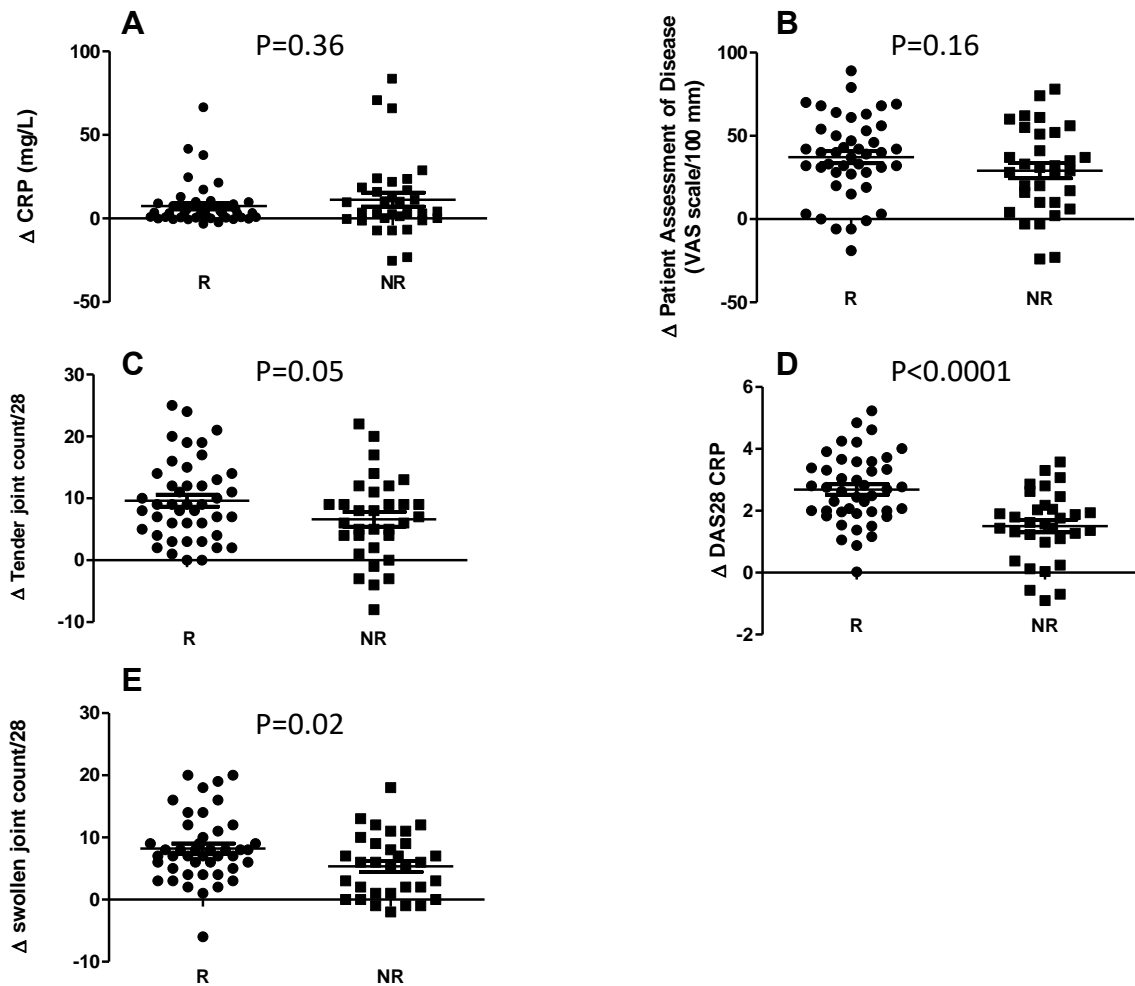

**Additional file 1: Variation of clinical and biological parameters between baseline and 6 months according to response.** Variations between baseline and 6 months were plotted for each parameters: C reactive protein (CRP) (A), patient assessment of disease (B), number of tender joint count/28 (C), DAS28(CRP) (D), and number of swollen joint count/28 (E). n=68 RA patients (36 R and 32 NR) and *p*. Values were obtained by t-test. DAS28: disease activity score. VAS: visual analog scale.
