# Supplementary material for: Pre-silencing of genes involved in the electron transport chain (ETC) pathway is associated with responsiveness to abatacept in rheumatoid arthritis
Source: Springer Nature journal article supplement (doi:10.1186/s13075-017-1319-8), 2017-05-25
Supplement: MOESM4 [file 12316062]

| GeneSymbol | GeneName                                                            | RefSeq Accession | Go class number | Evidence Code (contributors)  |
|------------|---------------------------------------------------------------------|------------------|-----------------|-------------------------------|
| ATP5J      | ATP synthase, H+ transporting, mitochondrial Fo complex, subunit F6 | NM_001003703     | GO:0022900      | IDA (UniProt) TAS (reactome)  |
| BLOC1S1    | biogenesis of lysosomal organelles complex-1, subunit 1             | NM_001487        | GO:0045333      | IMP (UniProt)                 |
| C14orf2    | chromosome 14 open reading frame 2                                  | NM_004894        | GO:0031966      | ISS (UniProt)                 |
| COX6A1     | cytochrome c oxidase subunit VIa polypeptide 1                      | NM_004373        | GO:0022900      | TAS (reactome)                |
| COX7A2     | cytochrome c oxidase subunit VIIa polypeptide 2                     | NM_001865        | GO:0031966      | TAS (reactome) IEA (InterPro) |
| COX7B      | cytochrome c oxidase subunit VIIb                                   | NM_001866        | GO:0022900      | TAS (reactome)                |
| MPC2       | mitochondrial pyruvate carrier 2                                    | NM_015415        | GO:0031966      | IBA (GO_Central)              |
| NDUFA4     | NDUFA4, mitochondrial complex associated                            | NM_002489        | GO:0031966      | IDA (UniProt) TAS (reactome)  |
| NDUFA6     | NADH dehydrogenase (ubiquinone) 1 alpha subcomplex, 6, 14kDa        | NM_002490        | GO:0031966      | IDA (UniProt) TAS (reactome)  |
| TIMM8B     | translocase of inner mitochondrial membrane 8 homolog B             | NM_012459        | GO:0031966      | IEA (InterPro)                |
| UQCRCQ     | ubiquinol-cytochrome c reductase, complex III subunit VII, 9.5kDa   | NM_014402        | GO:0022900      | TAS (reactome)                |

**Additional file 4: Transcripts associated with GeneOntology enrichment analysis.** Eleven transcripts out of 87 significantly dys-regulated between R and NR at baseline were associated with 18 GeneOntology classes significantly enriched. Gene symbol, gene full name, RefSeq accession number, GO class number and evidence code (according to the contributors [UniProt, Reactome, GO\_Central, InterPro] which links gene and GO class are indicated. IBA : Inferred from Biological aspect of Ancestor (Computational source of evidence), IDA : Inferred from Direct Assay (Experimental source of evidence), IEA : Inferred from Electronic Assay (Computational source of evidence), IMP : Inferred from Mutant Phenotype (Experimental source of evidence), ISS : Inferred from sequence or structural similarity (Computational source of evidence), TAS : Traceable Author Statement (Indirectly derived from experimental or computational evidence made by the author of the published article).
