# Supplementary material for: Pre-silencing of genes involved in the electron transport chain (ETC) pathway is associated with responsiveness to abatacept in rheumatoid arthritis
Source: Springer Nature journal article supplement (doi:10.1186/s13075-017-1319-8), 2017-05-25
Supplement: MOESM5 [file 12316062]

| <b>A</b>             |               |               |               |              |               |               |              |
|----------------------|---------------|---------------|---------------|--------------|---------------|---------------|--------------|
|                      | <b>NDUFA4</b> | <b>NDUFA6</b> | <b>UQCQRQ</b> | <b>ATP5J</b> | <b>COX6A1</b> | <b>COX7A2</b> | <b>COX7B</b> |
| <b>R</b>             | 0.36          | 0.39          | 0.31          | 0.49         | 0.31          | 0.25          | 0.37         |
| <b>R<sup>2</sup></b> | 0.13          | 0.16          | 0.10          | 0.24         | 0.09          | 0.06          | 0.14         |

  

| <b>B</b>             |               |               |               |              |               |               |              |
|----------------------|---------------|---------------|---------------|--------------|---------------|---------------|--------------|
|                      | <b>NDUFA4</b> | <b>NDUFA6</b> | <b>UQCQRQ</b> | <b>ATP5J</b> | <b>COX6A1</b> | <b>COX7A2</b> | <b>COX7B</b> |
| <b>R</b>             | 0.34          | 0.39          | 0.34          | 0.43         | 0.36          | 0.32          | 0.36         |
| <b>R<sup>2</sup></b> | 0.11          | 0.15          | 0.11          | 0.18         | 0.13          | 0.10          | 0.13         |

**Additional file 5: Low correlation between inflammatory state or disease activity and gene expression level from the ETC pathway at baseline.**

Pearson correlation coefficient (R) and coefficient of determination (R<sup>2</sup>) were calculated for each gene expression level (Fold Change) for the 7 mRNA from “electron transport chain” pathway significantly dysregulated between R and NR and CRP rate (mg/mL) (A) or DAS28(CRP) (B). n=36 rheumatoid arthritis patients (subset 1). R: responder, NR: non-responders, CRP: C reactive protein, DAS28: Disease activity score 28.
